# Supplementary material for: Regulated in Development and DNA Damage Responses -1 (REDD1) Protein Contributes to Insulin Signaling Pathway in Adipocytes
Source: PLOS journal article supplement (doi:10.1371/journal.pone.0052154), 2012-12-18
Supplement: S1 (10.1371/journal.pone.0052154.s001) [file journal.pone.0052154.s001]

**A. hMADS adipocytes**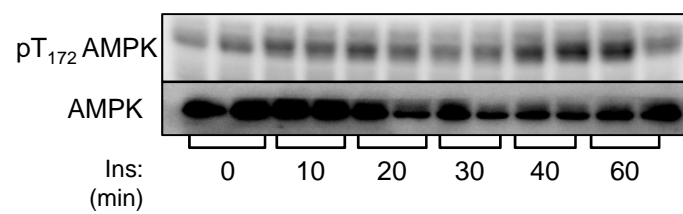**B. 3T3-L1 adipocytes**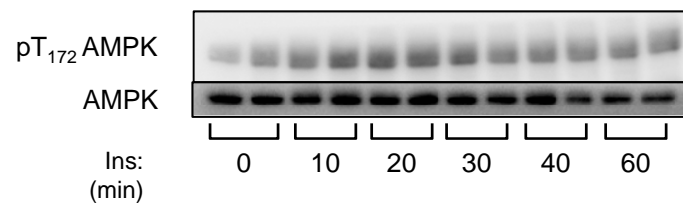**Figure S1**

hMADS adipocytes (A) and 3T3-L1 adipocytes (B) were stimulated with insulin (100 nM) for the indicated period of times and analyzed by immunoblots with indicated antibodies.
