# Supplementary material for: Regulated in Development and DNA Damage Responses -1 (REDD1) Protein Contributes to Insulin Signaling Pathway in Adipocytes
Source: PLOS journal article supplement (doi:10.1371/journal.pone.0052154), 2012-12-18
Supplement: S2 (10.1371/journal.pone.0052154.s002) [file journal.pone.0052154.s002]

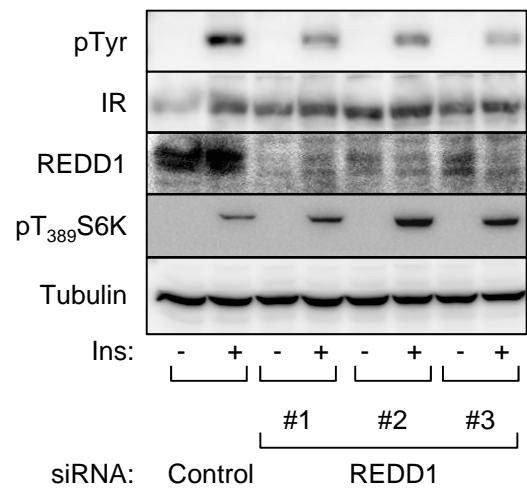

**Figure S2**

3T3-L1 adipocytes were transfected with REDD1 siRNA (#1: s93077, #2: s93078, #3: 74747) as mentioned in materials and methods. 48 h after transfection, adipocytes were stimulated with insulin (10 nM) for 5 minutes. Proteins were analyzed by immunoblots using indicated antibodies.
